# Supplementary figures and images for: VEGF-A Is Necessary and Sufficient for Retinal Neuroprotection in Models of Experimental Glaucoma
Source: PubMed Central journal article supplement — Am J Pathol. 2013 Apr;182(4):1379–90. doi: 10.1016/j.ajpath.2012.12.032 (PMC3608027; doi:10.1016/j.ajpath.2012.12.032), 2013-04

Figure S3

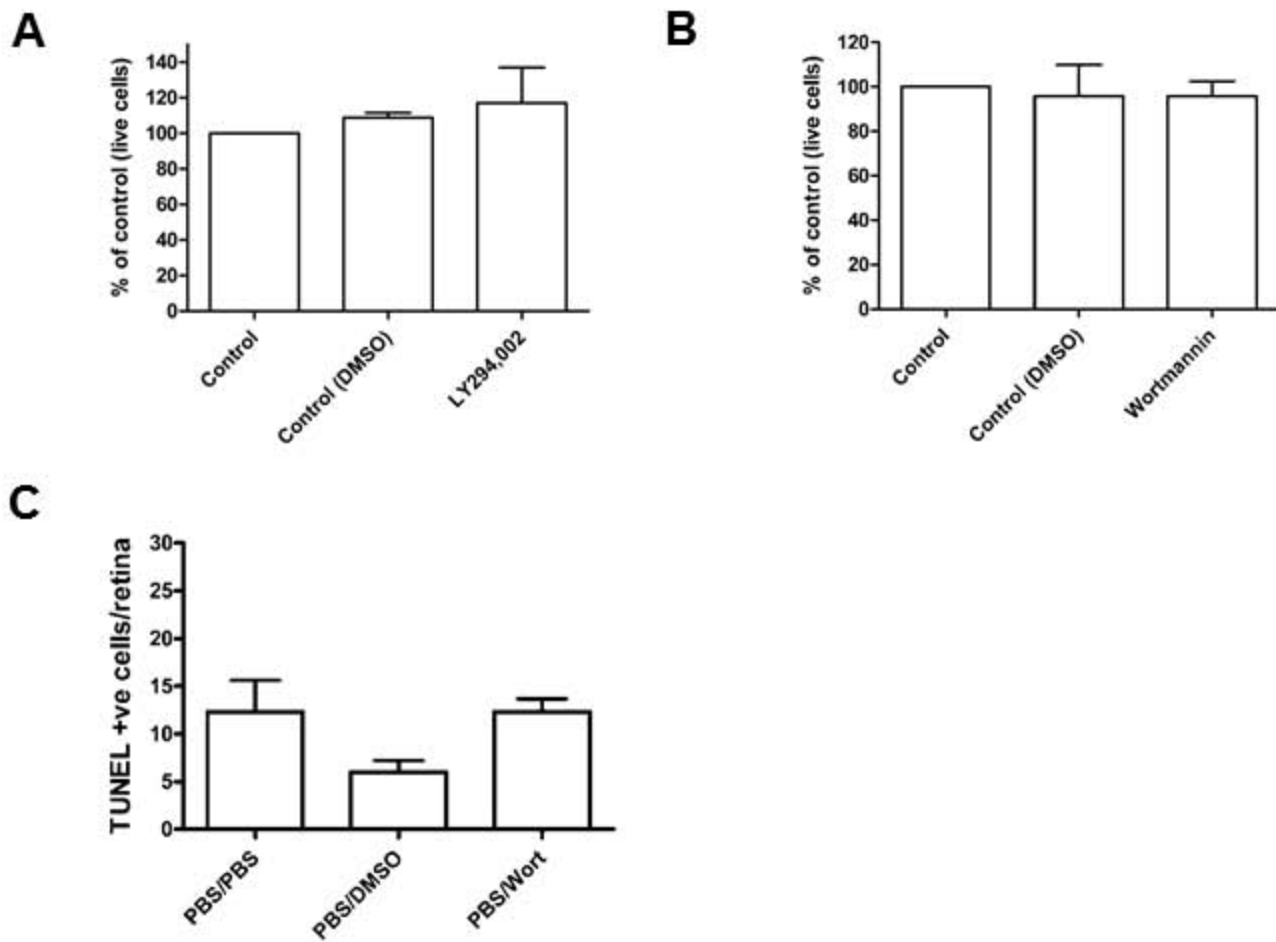

Supplement: mmc3.pdf [file mmc3.pdf]

Figure S4

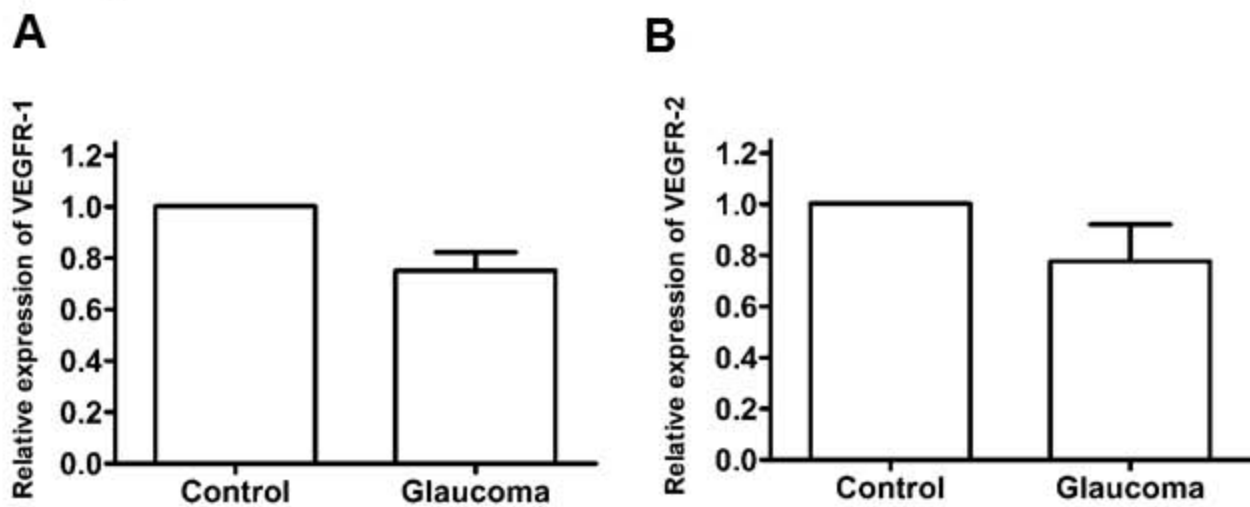

Supplement: mmc4.pdf [file mmc4.pdf]
